# Supplementary material for: Enhancing the Understanding of Ferroptosis Mechanisms in Glioblastoma: An Integrated Approach Utilizing Single-Cell Sequencing and Mendelian Randomization Methods
Source: Research Square preprint supplement (doi:10.21203/rs.3.rs-5925744/v1), 2025-02-24
Supplement: Supplementary file 1 [file 2f590d68fc8e98a69b2355eb.xlsx]

## Sheet: Sheet1
Supplementary Table 1: List of ferroptosis-related genes
Symbol
ABCC1
ACADSB
ACO1
ACSF2
ACSL1
ACSL4
ACVR1B
ADAM23
AEBP2
AGPAT3
AGPS
ALOX12
ALOX12B
ALOX15
ALOX15B
ALOX5
ALOXE3
AMN
ANO6
AQP3
AQP5
AQP8
ARHGEF26-AS1
ASMTL-AS1
ATF3
ATF4
ATG13
ATG16L1
ATG3
ATG4D
ATG5
ATG7
ATM
ATP5MC3
BACH1
BAP1
BECN1
BID
BRD7
BRPF1
CARS1
CCDC6
CD82
CDCA3
CDKN2A
CDO1
CFL1
CGAS
CHAC1
CHP1
CIRBP
CLTRN
COX4I2
CPEB1
CS
CTSB
CYB5R1
CYBB
CYGB
CYP4F8
CircKDM4C
DCAF7
DDR2
DLD
DNAJB6
DPEP1
DPP4
DUOX1
DUOX2
EGFR
EGLN2
EGR1
ELAVL1
ELOVL5
EMC2
EPAS1
EPT1
FADS1
FADS2
FAR1
FBXW7
FLT3
FOXO4
G6PD
G6PDX
GABARAPL1
GABARAPL2
GJA1
GLS2
GOT1
GPAT4
GRIA3
GSK3B
GSTZ1
H19
HDDC3
HIF1A
HILPDA
HMGB1
HMOX1
HOTAIR
HRAS
IDH1
IDO1
IFNA1
IFNA10
IFNA13
IFNA14
IFNA16
IFNA17
IFNA2
IFNA21
IFNA4
IFNA5
IFNA6
IFNA7
IFNA8
IFNG
IL1B
IL6
INTS2
IREB2
KDM5A
KDM5C
KDM6B
KEAP1
KLF2
KMT2D
KRAS
LCE2C
LGMN
LIFR
LIG3
LINC00472
LINC00618
LONP1
LPCAT3
LPIN1
LYRM1
MAP1LC3A
MAP3K11
MAP3K14
MAPK1
MAPK14
MAPK3
MAPK8
MAPK9
MDM2
MDM4
MEG3
METTL14
MFN2
MIB1
MIB2
MICU1
MIOX
MIR135B
MIR15A
MIR214
MIR302A
MIR324
MIR335
MIR375
MIR5096
MIR539
MIR6852
MIR761
MLLT1
MMD
MT1DP
MTCH1
MTDH
MYB
MYCN
NCOA4
NDRG1
NOX1
NOX3
NOX4
NOX5
NR1D1
NR1D2
NRAS
OSBPL9
PANX1
PAQR3
PEBP1
PEX10
PEX12
PEX2
PEX3
PEX6
PGD
PGRMC1
PHF21A
PHKG2
PIEZO1
PIK3CA
POM121L12
POR
PPARG
PRKAA1
PRKAA2
PRKCA
PTEN
PTPN6
PVT1
QSOX1
RPL8
SAT1
SCP2
SIRT1
SIRT3
SLC11A2
SLC1A5
SLC25A28
SLC38A1
SLC39A14
SLC39A7
SLC7A11
SMAD7
SMG9
SMPD1
SNCA
SNX4
SNX5
SOCS1
STING1
TAFAZZIN
TBK1
TF
TFR2
TFRC
TGFB1
TGFBR1
TIMM9
TIMP1
TLR4
TNFAIP3
TOR2A
TP53
TRIM21
TRIM26
TRIM46
TSC1
TTPA
ULK1
ULK2
USP11
USP7
VDAC2
WIPI1
WIPI2
WWTR1
YAP1
YTHDC2
YY1AP1
ZEB1
ZFAS1
circPSEN1
hsa_circ_0008367
lncRNA AABR07017145.1
miR-182-5p
miR-378a-3p
ABCC5
ABHD12
ACOT1
ACSL3
ADAMTS13
ADIPOQ
AHCY
AIFM2
AKR1C1
AKR1C2
AKR1C3
AKT1S1
ALDH3A2
AR
ARF6
ARNTL
ASAH2
ATF2
BCAT2
BEX1
BRD2
BRD3
BRD4
BRDT
CA9
CAMKK2
CAV1
CBS
CD44
CDC25A
CDH1
CDKN1A
CHMP1A
CHMP5
CHMP6
CISD1
CISD2
CISD3
COPZ1
CP
CREB1
CREB3
CREB5
CircFNDC3B
CircIL4R
CircPVT1
DAZAP1
DECR1
DHODH
ECH1
ENO3
ENPP2
ETV4
EZH2
FABP4
FANCD2
FGF21
FH
FNDC5
FTH1
FTL
FTMT
FURIN
FXN
FZD7
Fer1HCH
GALNT14
GCH1
GCLC
GDF15
GLRX5
GPX4
GSTM1
HCAR1
HELLS
HSF1
HSPA5
HSPB1
IDH2
ISCU
JUN
KDM3B
KDM4A
KIF20A
KLHDC3
LAMP2
LCN2
LINC00336
LINC01833
MAPKAP1
MARCHF5
MEF2C
MEG8
MGST1
MIR130B
MIR137
MIR17
MIR18A
MIR190A
MIR212
MIR27A
MIR424
MIR4443
MIR522
MIR545
MIR670
MIR9-1
MIR9-2
MIR9-3
MIR9-3HG
MLST8
MPC1
MS4A15
MT1G
MTF1
MTOR
MUC1
NCOA3
NEAT1
NEDD4
NEDD4L
NF2
NFE2L2
NFS1
NOS2
NQO1
NR4A1
NR5A2
NT5DC2
NUPR1
OIP5-AS1
OTUB1
P4HB
PANX2
PARK7
PARP1
PARP10
PARP11
PARP12
PARP14
PARP15
PARP16
PARP2
PARP3
PARP4
PARP6
PARP8
PARP9
PDK4
PDSS2
PEDS1
PIR
PLA2G6
PLIN2
PML
PPARA
PPARD
PPP1R13L
PRDX1
PRDX6
PROK2
PROM2
PRR5
PTPN18
RARRES2
RB1
RBMS1
RELA
RHEBP1
RICTOR
RNF113A
RPTOR
RRM2
SCD
SENP1
SESN2
SIAH2
SIRT2
SIRT6
SLC16A1
SLC3A2
SLC40A1
SOX2
SQSTM1
SRC
SREBF1
SREBF2
SRSF9
STAT3
STK11
SUV39H1
TERT
TFAM
TFAP2A
TMBIM4
TMEM161B-DT
TMSB4X
TMSB4Y
TP63
TRIB2
TXN
TYRO3
USP35
VCP
VDR
ZFP36
circ-TTBK2
circ0097009
circDTL
circEPSTI1
circGFRA1
circKIF4A
circRHBG
circRHOT1
circRNA1615
circ_0007142
circ_0067934
miR-7-5p
mmu_circRNA_0000309
PTGS2
ALB
ANGPTL7
ARRDC3
ASNS
ATP6V1G2
AURKA
BLOC1S5-TXNDC5
BNIP3
CAPG
CBR1
CEBPG
CXCL2
DDIT3
DDIT4
DRD4
DRD5
DUSP1
EIF2AK4
EIF2S1
GABPB1
GLUT13
GPT2
GPX2
HAMP
HBA1
HERPUD1
HIC1
HNF4A
HSD17B11
IL33
JDP2
KIM-1
KLHL24
LOC284561
LOC390705
LRRFIP1
LURAP1L
MAFG
MAP3K5
MIR30B
MIR4715
MMP13
MT3
NCF2
NGB
NNMT
OXSR1
PCK2
PLIN4
PSAT1
RGS4
RIPK1
SELENOS
SETD1B
SLC1A4
SLC2A1
SLC2A12
SLC2A14
SLC2A3
SLC2A6
SLC2A8
SLC7A5
SNORA16A
SP1
SRXN1
STEAP3
STMN1
TFAP2C
TRIB3
TSC22D3
TUBE1
TXNIP
TXNRD1
UBC
VEGFA
VLDLR
XBP1
YWHAE
ZFP69B
ZNF419
